# Supplementary material for: ERα36–GPER1 Collaboration Inhibits TLR4/NFκB-Induced Pro-Inflammatory Activity in Breast Cancer Cells
Source: MDPI journal article supplement (doi:10.3390/ijms22147603), 2021-07-16
Supplement: s1 [file s1]

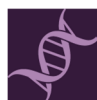

## Supplemental Tables

**Table S1.** Primers used for the PCR studies.

| Gene            | Forward Primer          | Reverse Primer            |
|-----------------|-------------------------|---------------------------|
| ER $\alpha$ 66  | AATTCAGATAATCGACGCCAG   | TTTCAACATTCTCCCTCCTC      |
| ER $\alpha$ 36  | CCAAGAATGTTCAACCACAACCT | GCACGGTTCATTAAACATCTTTCTG |
| GP $\alpha$ ER1 | TGGTGGTGAACATCAGCTTC    | TGAGCTTGTCCCTGAAGGTC      |
| CXCL12          | GGGCTCCTACTGTAAGGGTT    | TTGACCCGAAGCTAAAGTGG      |
| CXCR4           | GGTGCTGAAATCAACCCAC     | CGTGGAACGTTTTTCCTGTT      |
| cMYC            | CACCGAGTCGTAGTCGAGGT    | TTTCGGGTAGTGGAACCA        |
| TNF $\alpha$    | AGATGATCTGACTGCCTGGG    | CTGCTGCACTTTGGAGTGAT      |
| IL-6            | GTCAGGGGTGGTTATTGCAT    | AGTGAGGAACAAGCCAGAGC      |
| PD-L1           | TATGGTGGTGGCGACTACAA    | TGGCTCCCAGAATTACCAAG      |
| Cyclophilin A   | ATGGTCAACCCACCGTGT      | TTCTGCTGTCTTTGGAACCTTGTC  |

**Table S2.** Binding simulation studies of ER $\alpha$  and ER $\alpha$ 36 with GP $\alpha$ ER1 and NF $\kappa$ B. X denotes either a non-measurable binding or a measurable yet non-expected binding. NR = Non-relevant information, either because the molecule did not participate in the complex or because of a non-identified molecular interaction.

| MONOMERS |                                            |                            |                       |                    |                    |
|----------|--------------------------------------------|----------------------------|-----------------------|--------------------|--------------------|
| No       | Complex 1 (ligand)                         | Complex 2 (ligand)         | $\Delta G$ (Kcal/mol) | NLS ER $\alpha$ 36 | NLS NF- $\kappa$ B |
| 1        | GP $\alpha$ ER1                            | ER $\alpha$ 36             | −565.19               | BLOCKED            | NR                 |
| 2        | GP $\alpha$ ER1(Estradiol)                 | ER $\alpha$ 36             | X                     | NR                 | NR                 |
| 3        | GP $\alpha$ ER1(Estradiol)                 | ER $\alpha$ 36(Estradiol)  | −238.74 (X)           | BLOCKED            | NR                 |
| 4        | GP $\alpha$ ER1                            | ER $\alpha$ 36(Estradiol)  | −296.07 (X)           | FREE               | NR                 |
| 5        | GP $\alpha$ ER1                            | G $\alpha$ iGDP            | X                     | NR                 | NR                 |
| 6        | GP $\alpha$ ER1(Estradiol)                 | G $\alpha$ iGDP            | −689.54               | NR                 | NR                 |
| 7        | GP $\alpha$ ER1(Estradiol)-G $\alpha$ iGDP | ER $\alpha$ 36             | X                     | NR                 | NR                 |
| 8        | GP $\alpha$ ER1(Estradiol)-G $\alpha$ iGDP | ER $\alpha$ 36(Estradiol)  | −218.27 (X)           | FREE               |                    |
| 9        | GP $\alpha$ ER1                            | G $\alpha$ sGDP            | X                     | NR                 | NR                 |
| 10       | GP $\alpha$ ER1(Estradiol)                 | G $\alpha$ sGDP            | X                     | NR                 | NR                 |
| 11       | ER $\alpha$ 36                             | NF $\kappa$ B              | X                     | NR                 | NR                 |
| 12       | ER $\alpha$ 36(Estradiol)                  | NF $\kappa$ B              | −312.60 (X)           | FREE               | FREE               |
| 13       | ER $\alpha$ 36(Estradiol)-NF $\kappa$ B    | GP $\alpha$ ER1            | −676.75               | FREE               | FREE               |
| 14       | ER $\alpha$ 36(Estradiol)-NF $\kappa$ B    | GP $\alpha$ ER1(Estradiol) | −815.93               | FREE               | BLOCKED            |
| 15       | GP $\alpha$ ER1                            | NF $\kappa$ B              | −958.32               | NR                 | FREE               |
| 16       | GP $\alpha$ ER1(Estradiol)                 | NF $\kappa$ B              | −1015.87              | NR                 | FREE               |
| 17       | GP $\alpha$ ER1-NF $\kappa$ B              | ER $\alpha$ 36             | X                     | NR                 | NR                 |
| 18       | GP $\alpha$ ER1-NF $\kappa$ B              | ER $\alpha$ 36(Estradiol)  | −423.65               | FREE               | FREE               |
| 19       | GP $\alpha$ ER1(Estradiol)-NF $\kappa$ B   | ER $\alpha$ 36             | X                     | NR                 | NR                 |
| 20       | GP $\alpha$ ER1(Estradiol)-NF $\kappa$ B   | ER $\alpha$ 36(Estradiol)  | −450.29               | BLOCKED            | FREE               |
| 21       | GP $\alpha$ ER1-NF $\kappa$ B              | ER $\alpha$ 66             | −797.14               | FREE               | FREE               |
| 22       | GP $\alpha$ ER1-NF $\kappa$ B              | ER $\alpha$ 66(Estradiol)  | −801.41               | FREE               | FREE               |
| 23       | GP $\alpha$ ER1(Estradiol)-NF $\kappa$ B   | ER $\alpha$ 66             | −845.62               | FREE               | FREE               |
| 24       | GP $\alpha$ ER1(Estradiol)-NF $\kappa$ B   | ER $\alpha$ 66(Estradiol)  | −681.13               | BLOCKED            | FREE               |
| 25       | GP $\alpha$ ER1                            | ER $\alpha$ 66             | −984.59               | BLOCKED            | NR                 |

| 26     | GP1R(Estradiol)                         | ERa66                           | X                     | NR        | NR        |
|--------|-----------------------------------------|---------------------------------|-----------------------|-----------|-----------|
| 27     | GP1R(Estradiol)                         | ERa66(Estradiol)                | X                     | NR        | NR        |
| 28     | GP1R                                    | ERa66(Estradiol)                | X                     | NR        | NR        |
| 29     | GP1R-ERa36                              | NFkB                            | X                     | NR        | NR        |
| 30     | GP1R-ERa36                              | NFkB                            | X                     | NR        | NR        |
| 31     | GP1R(Estradiol)-GaiGDP                  | NFkB                            | -1028.28              | NR        | FREE      |
| 32     | GP1R(Estradiol)-GaiGDP-ERa36(Estradiol) | NFkB                            | -446.71               | FREE      | FREE      |
| 33     | GP1R(Estradiol)-GaiGDP-NFkB             | ERa36                           | X                     | NR        | NR        |
| 34     | GP1R(Estradiol)-GaiGDP-NFkB             | ERa36(Estradiol)                | -564.81               | BLOCKED   | FREE      |
| 35     | GP1R(Estradiol)-GaiGDP                  | ERa66                           | X                     | NR        | NR        |
| 36     | GP1R(Estradiol)-GaiGDP                  | ERa66(Estradiol)                | -918.39               | FREE      | NR        |
| 37     | GP1R(Estradiol)-GaiGDP-ERa66(Estradiol) | NFkB                            | -343.15 (X)           | FREE      | FREE      |
| 38     | GP1R(Estradiol)-GaiGDP-NFkB             | ERa66                           | X                     | NR        | NR        |
| 39     | GP1R(Estradiol)-GaiGDP-NFkB             | ERa66(Estradiol)                | -569.75               | BLOCKED   | FREE      |
| DIMERS |                                         |                                 |                       |           |           |
| No     | Receptor                                | Ligand                          | $\Delta G$ (Kcal/mol) | NLS ERa36 | NLS NF-kB |
| 1      | ERa36(Estradiol)                        | ERa36(Estradiol)                | -609.34               | FREE      | NR        |
| 2      | GP1R(Estradiol)-GaiGDP                  | GP1R(Estradiol)-GaiGDP          | -407.97               | NR        | NR        |
| 3      | [GP1R(Estradiol)-GaiGDP] <sub>2</sub>   | [ERa36(Estradiol)] <sub>2</sub> | X                     | NR        | NR        |
| 4      | GP1R(Estradiol)] <sub>2</sub>           | [ERa36(Estradiol)] <sub>2</sub> | X                     | NR        | NR        |
| 5      | [GP1R(Estradiol)] <sub>2</sub>          | NFkB                            | -508.50               | NR        | FREE      |
| 6      | [GP1R(Estradiol)] <sub>2</sub> -NFkB    | NFkB                            | -1065.20              | NR        | FREE      |
| 7      | [GP1R(Estradiol)-NFkB] <sub>2</sub>     | [ERa36(Estradiol)] <sub>2</sub> | -664.51               | FREE      | FREE      |

## Supplemental Figures

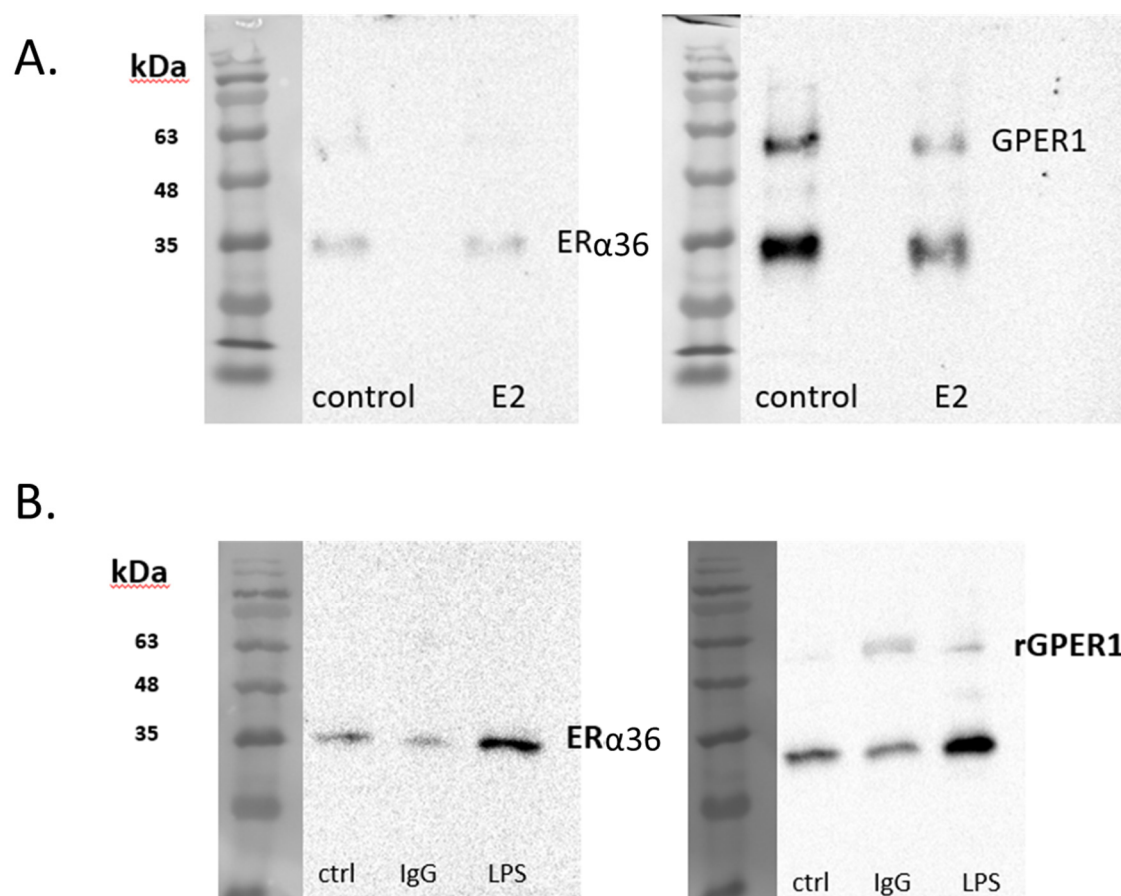

**Figure S1.** Co-immunoprecipitation studies in SKBR3 cells. A. E2 ( $10^{-6}$  M) treatment of SKBR3 cells did not lead to increased precipitation of ERα36 when an anti-GPER1 was used for the initial protein precipitation. B. However, when cells were treated with LPS, an increased amount of ERα36 could be found in the precipitate. All experiments were repeated three times.

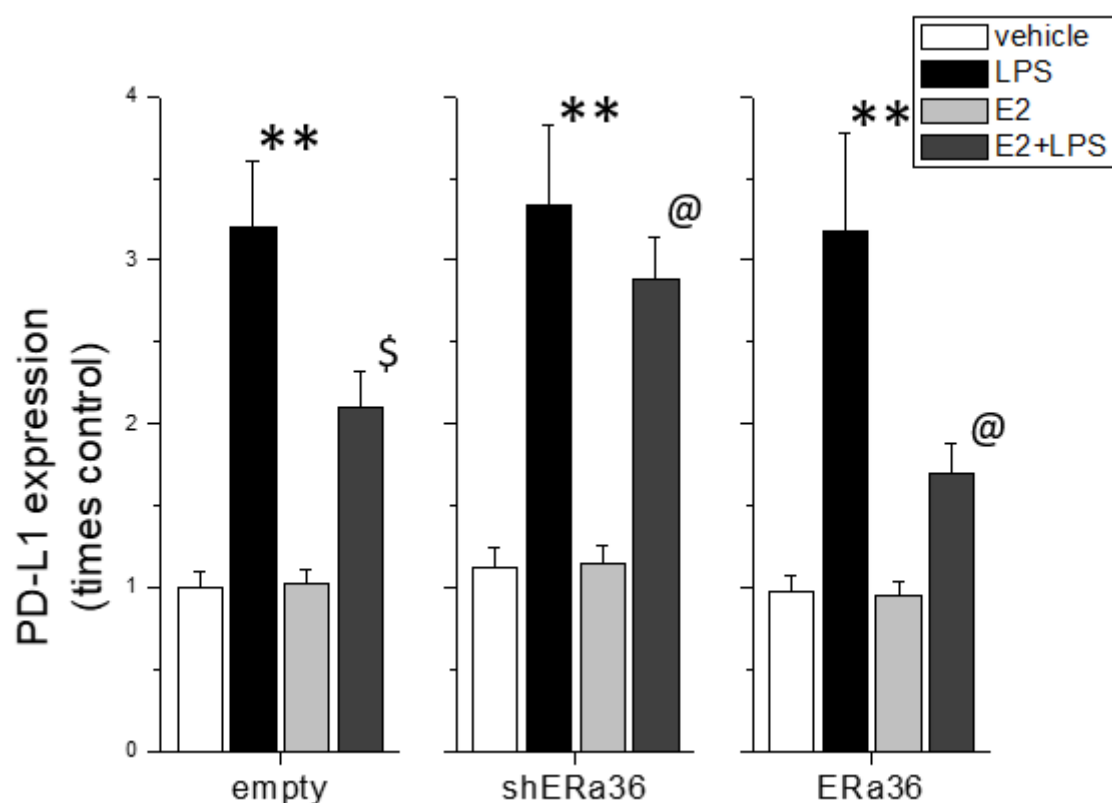

**Figure S2.** qPCR analysis of PD-L1 expression in SKBR3 cells under conditions of ERα36 knock-down or overexpression. All experiments were repeated three times in triplicates. \*  $p < 0.05$  and \*\*  $p < 0.01$  vs. vehicle, \$  $p < 0.05$  vs. LPS, @  $p < 0.05$  and @@  $p < 0.01$  vs. E2 + LPS in empty, one-way ANOVA with Dunnet's test for multiple comparisons.

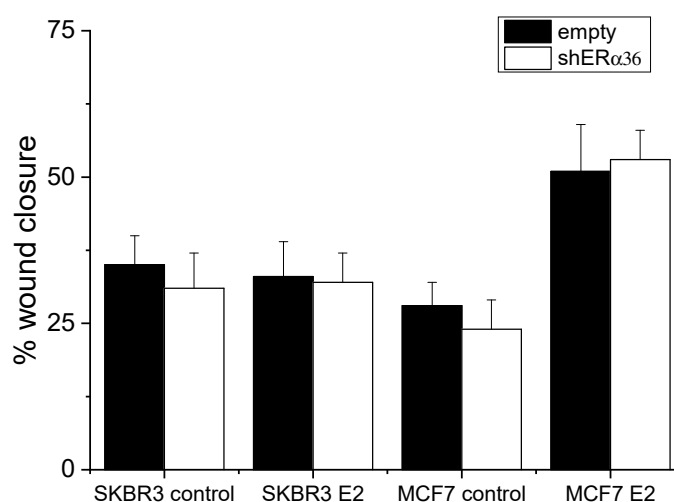

**Figure S3.** Wound healing assay in SKBR3 and MCF7 cells in the presence and the absence of estrogen. Knock-down of ERα36 expression did not affect the wound healing capacity of the studied cell lines,  $n = 3$ .

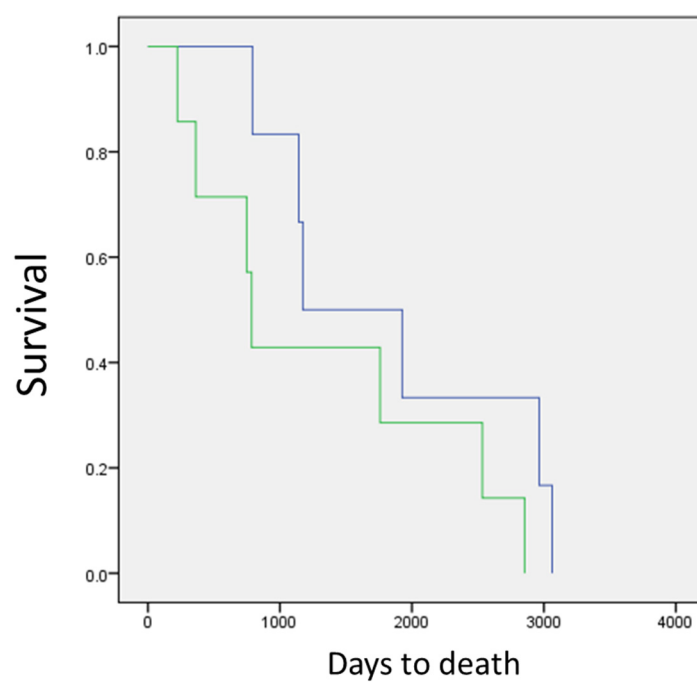

**Figure S4.** Kaplan–Mayer survival curves of Caucasian breast cancer patients that displayed an expression of ERα36 above (blue) or below (green) the median of the whole TCGA breast cancer cohort. The difference between the two groups was not statistically significant, probably due to the small number of patients with reported cancer-related death in the cohort.
